# Supplementary material for: Bayesian Comparison of Neurovascular Coupling Models Using EEG-fMRI
Source: PubMed Central journal article supplement (PMC3116890; doi:10.1371/journal.pcbi.1002070), 2011-06-16
Supplement: pcbi.1002070.s001.pdf [file pcbi.1002070.s001.pdf]

## Supporting material

### S.1 Electrovascular model

**Neural mass model** The equations used to generate the electrical dynamics in the cortical unit are summarised below:

$$\begin{aligned}
\tau_m \frac{dV_{IN}^T(t)}{dt} + V_{IN}^T(t) &= I_3^+(t) R_m^0 \\
\tau_m \frac{dV_{IN}^F(t)}{dt} + V_{IN}^F(t) &= I^+(t) R_m^0 \\
\tau_m \frac{d\nu_1(t)}{dt} + \nu_1(t) &= R_m^1 I_1^+(t) \\
\tau_m \frac{d\nu_2(t)}{dt} + \nu_2(t) &= R_m^2 I_2^+(t) \\
\tau_m \frac{d\nu_-(t)}{dt} + \nu_-(t) &= R_m I^-(t) \\
\tau_m \frac{dV_{PC}(t)}{dt} &= -(\alpha_0 + \sum_k \frac{1}{\beta_k}) V_{PC}(t) + \frac{\Omega(t)}{\prod_k \beta_k} + R_m I^-(t) \\
&+ \sum_k \left[ \frac{R_m \nu_k(t)}{(R_i^k + R_e^k)} - \frac{\nu_-(t)}{\beta_k} \right]
\end{aligned} \tag{1}$$

$$\begin{aligned}
\tau_m \frac{d\Omega(t)}{dt} &= R_m \sum_k \frac{\beta_k (V_{PC}(t) - \nu_k(t))}{(R_i^k + R_e^k)} + V_{PC}(t) + \nu_-(t) - \Omega(t) \\
\tau_m \frac{d\rho(t)}{dt} &= -(\alpha_0 + \sum_k \frac{1}{\beta_k}) \rho(t) + \frac{\Theta(t)}{\prod_k \beta_k} \\
&+ \frac{R_e^2}{(R_i^2 + R_e^2)} (R_m I^-(t) + R_m^2 I_2^+(t)) \\
&+ \frac{[R_m^1 (\nu_-(t) + \nu_2(t)) + R_m (\nu_2(t) - \nu_1(t))] R_e^2}{\prod_k (R_i^k + R_e^k)} \\
\tau_m \frac{d\Theta(t)}{dt} &= \left[ 1 + R_m \sum_k \frac{1}{R_m^k} \right] \rho(t) - \Theta(t).
\end{aligned} \tag{2}$$

**Balloon model** Below is a summary of the Balloon model's equations:

$$\begin{aligned}
\frac{ds(t)}{dt} &= z(t) - \frac{s(t)}{\tau_s} - \frac{f(t) - 1}{\tau_f} \\
\frac{df(t)}{dt} &= s(t) \\
\tau_0 \frac{d\nu(t)}{dt} &= f(t) - \nu(t)^{1/\alpha} \\
\tau_0 \frac{dq(t)}{dt} &= \frac{f(t)}{E_0} [1 - (1 - E_0)^{1/f(t)}] - q(t) \nu(t)^{(1-\alpha)/\alpha}.
\end{aligned} \tag{3}$$

**Table 1.** Electrical and vascular states

| Electrical and vascular states |                                                                   |            |               |
|--------------------------------|-------------------------------------------------------------------|------------|---------------|
| Type                           | State                                                             | Symbol     | Initial value |
| Electrical                     | Membrane potential at the soma of GABAergic IN (Transmission)     | $V_{IN}^T$ | 0             |
|                                | Membrane potential at the soma of GABAergic IN (Feedback)         | $V_{IN}^F$ | 0             |
|                                | Membrane potential at the soma of Layer V PC                      | $V_{PC}$   | 0             |
|                                | Voltage difference                                                | $\Omega$   | 0             |
|                                | Equivalent voltage source at the layer V PC basal dendrites       | $\nu_1$    | 0             |
|                                | Equivalent voltage source at the layer V PC apical tuft dendrites | $\nu_2$    | 0             |
|                                | Equivalent voltage source at the soma of layer V PC               | $\nu_-$    | 0             |
|                                | Extracellular voltage difference along the layer V PC apical tuft | $\rho$     | 0             |
|                                | Voltage difference                                                | $\Theta$   | 0             |
|                                | Time derivative of the input (extended Balloon approach)          | r          | 0             |
|                                | Input (extended Balloon approach)                                 | z          | $z_0$         |
| Vascular                       | Flow-inducing signal                                              | s          | 0             |
|                                | CBF                                                               | f          | 1             |
|                                | CBV                                                               | $\nu$      | 1             |
|                                | Concentration of dHb                                              | q          | 1             |

**Table 2.** Fixed parameters: these parameters are not estimated from the data.

| Fixed parameters |                                 |                                                          |                  |          |
|------------------|---------------------------------|----------------------------------------------------------|------------------|----------|
| Type             | Symbol                          | Parameter                                                | Dimension        | Value    |
| Electrical       | $c_m$                           | Membrane capacitance                                     | $\mu F/cm^2$     | 0.75     |
|                  | $\tau_m$                        | Membrane time constant                                   | $ms$             | 30       |
|                  | $C_m^0$                         | Effective membrane resistance: soma compartment (IN)     | $nF$             | 6.81     |
|                  | $C_m$                           | Effective membrane capacitance: soma compartment (PC)    | $nF$             | 1.045    |
|                  | $R_m^0$                         | Membrane resistance: soma compartment (IN)               | $G\Omega$        | 4.082    |
|                  | $R_m$                           | Membrane resistance: soma compartment (PC)               | $G\Omega$        | 2.871    |
|                  | $R_m^1$                         | Membrane resistance: basal compartment                   | $G\Omega$        | 0.222    |
|                  | $R_m^2$                         | Membrane resistance: apical tuft compartment             | $G\Omega$        | 0.667    |
|                  | $R_i^1$                         | Membrane resistance: basal longitudinal (intracellular)  | $G\Omega$        | 0.226    |
|                  | $R_e^1$                         | Membrane resistance: basal longitudinal (extracellular)  | $G\Omega$        | 0.272    |
|                  | $R_i^2$                         | Membrane resistance: apical longitudinal (intracellular) | $G\Omega$        | 2.264    |
|                  | $R_e^2$                         | Membrane resistance: apical longitudinal (extracellular) | $G\Omega$        | 2.716    |
|                  | $\alpha_{PC}$                   | Layer V PC synaptic factor                               | $pA(0 \sim 1.5)$ | 0.4      |
|                  | $\gamma_{IN}$                   | GABAergic IN voltage-ampere relationships                | $mV^{-1}$        | 5        |
|                  | $V_0^{IN}$                      | GABAergic IN voltage-ampere relationships                | $mV$             | 0.7      |
|                  | $\beta_1$                       | Basal voltage divisor                                    | no dim.          | 2.24     |
|                  | $\beta_2$                       | Apical voltage divisor                                   | no dim.          | 7.45     |
|                  | $\alpha_0$                      | Mixed coefficient                                        | no dim.          | 7.32     |
| Others           | $\chi_{PC}$                     | Layer V PC energetic factor                              | $nM(0 \sim 1)$   | 1.0      |
|                  | $\chi_{IN}$                     | GABAergic IN energetic factor                            | $nM(0 \sim 1)$   | 0.8      |
|                  | $\omega_0$                      | Low-pass filter: angular high cut frequency              | $Hz$             | $2\pi 8$ |
|                  | $\delta$                        | Low-pass filter: damping factor                          | no dim.          | 0.8      |
|                  | $A$                             | Low-pass filter: gain                                    | $nM^{-1}$        | 1.0      |
|                  | $\rho_{PC}$                     | Layer V PC nonlinear function                            | no dim.          | 1.0      |
|                  | $\rho_{IN}$                     | GABAergic IN nonlinear function                          | no dim.          | 1.0      |
|                  | $\omega_{PC}$                   | Layer V PC nonlinear function                            | $(nA)^2$         | 0.1091   |
| $\omega_{IN}$    | GABAergic IN nonlinear function | $(nA)^2$                                                 | 0.0464           |          |

**Table 3. Model comparison results.** Log-evidence values for each model, session and subject (low-frequencies, high-frequencies and all-frequencies). ‘Sum’ is the sum of the log-evidences per session and ‘Group’ the sum of all subjects’ sums. The values in bold correspond to the winning model for each session and subject.  $BF_{12}$  are the log-Bayes factors between the best (1) and second best (2) model for each session. The values  $x^*$  correspond to a posterior probability for the best model higher than 0.95. The values  $x^{**}$  correspond to a posterior probability higher than 0.99.  $\diamond$ One of the subjects lacked the 4.0 and 7.5 Hz stimulus epochs and was therefore not included in ‘low-frequency’ analyses.

| Log-evidences, $F_x$ , Bayes Factors $B_{xy}$ and ‘mixture’ model coefficient (synaptic) $\omega_{in}$ |                            |                |                |                |           |               |
|--------------------------------------------------------------------------------------------------------|----------------------------|----------------|----------------|----------------|-----------|---------------|
| Subject                                                                                                | Session                    | $F_{mix}$      | $F_{in}$       | $F_{out}$      | $BF_{12}$ | $\omega_{in}$ |
|                                                                                                        | Low frequencies $\diamond$ | (4 to 15 Hz)   |                |                |           |               |
| 1                                                                                                      | 1                          | -57.27         | -55.69         | -56.82         | 1.13      | 0.72          |
|                                                                                                        | 2                          | -37.27         | -34.89         | -44.58         | 2.38      | 0.80          |
|                                                                                                        | 3                          | -59.23         | -59.01         | -58.21         | 0.80      | 0.60          |
|                                                                                                        | Sum                        | -153.77        | <b>-149.59</b> | -159.61        | 4.18*     | 0.71          |
| 2                                                                                                      | 1                          | -39.54         | -38.53         | -42.25         | 1.01      | 0.66          |
|                                                                                                        | 2                          | -41.30         | -40.16         | -45.85         | 1.14      | 0.65          |
|                                                                                                        | 3                          | -34.21         | -33.40         | -37.69         | 0.81      | 0.67          |
|                                                                                                        | Sum                        | -115.05        | <b>-112.09</b> | -125.79        | 3.00*     | 0.69          |
| Group                                                                                                  |                            | -268.82        | <b>-261.68</b> | -285.40        | 7.14**    | 0.69          |
|                                                                                                        | High frequencies           | (12 to 30 Hz)  |                |                |           |               |
| 1                                                                                                      | 1                          | -37.85         | -80.68         | -43.22         | 5.37**    | 0.60          |
|                                                                                                        | 2                          | -32.59         | -45.90         | -35.21         | 2.62      | 0.40          |
|                                                                                                        | 3                          | -47.59         | -44.56         | -87.01         | 3.03*     | 0.83          |
|                                                                                                        | Sum                        | <b>-118.03</b> | -171.14        | -165.44        | 53.11**   | 0.61          |
| 2                                                                                                      | 1                          | -69.48         | -69.92         | -68.57         | 0.91      | 0.55          |
|                                                                                                        | 2                          | -47.24         | -55.77         | -84.73         | 8.23**    | 0.48          |
|                                                                                                        | 3                          | -59.41         | -68.00         | -57.21         | 2.20      | 0.46          |
|                                                                                                        | Sum                        | <b>-176.13</b> | -193.69        | -210.51        | 17.56**   | 0.50          |
| 3                                                                                                      | 1                          | -31.91         | -43.06         | -34.27         | 2.36      | 0.46          |
|                                                                                                        | 2                          | -38.51         | -49.64         | -40.64         | 2.13      | 0.41          |
|                                                                                                        | 3                          | -29.60         | -44.52         | -31.27         | 1.67      | 0.43          |
|                                                                                                        | Sum                        | <b>-99.72</b>  | -137.22        | -106.18        | 6.46**    | 0.43          |
| Group                                                                                                  |                            | <b>-393.88</b> | -502.05        | -482.13        | 88.25**   | 0.51          |
|                                                                                                        | All frequencies            | (4 to 30 Hz)   |                |                |           |               |
| 1                                                                                                      | 1                          | -37.85         | -80.68         | -43.22         | 5.37**    | 0.60          |
|                                                                                                        | 2                          | -32.59         | -45.90         | -35.21         | 2.62      | 0.40          |
|                                                                                                        | 3                          | -47.59         | -44.56         | -87.01         | 3.30*     | 0.83          |
|                                                                                                        | Sum                        | <b>-118.03</b> | -171.14        | -165.44        | 53.11**   | 0.61          |
| 2                                                                                                      | 1                          | -89.78         | -90.93         | -88.10         | 1.68      | 0.56          |
|                                                                                                        | 2                          | -71.94         | -71.42         | -71.56         | 0.14      | 0.65          |
|                                                                                                        | 3                          | -79.46         | -91.57         | -80.48         | 1.02      | 0.59          |
|                                                                                                        | Sum                        | -241.18        | -253.92        | <b>-240.14</b> | 1.04      | 0.60          |
| 3                                                                                                      | 1                          | -49.41         | -61.05         | -52.21         | 2.80      | 0.49          |
|                                                                                                        | 2                          | -54.19         | -64.21         | -59.13         | 4.94*     | 0.46          |
|                                                                                                        | 3                          | -44.94         | -46.84         | -50.76         | 1.90      | 0.58          |
|                                                                                                        | Sum                        | <b>-148.54</b> | -172.12        | -162.10        | 13.56**   | 0.51          |
| Group                                                                                                  |                            | <b>-507.75</b> | -597.18        | -567.68        | 59.93**   | 0.57          |
